# Supplementary material for: Observation of a 1/3 magnetization plateau in Pb2Cu10O4(SeO3)4Cl7 arising from (Cu2+)7 clusters of corner-sharing (Cu2+)4 tetrahedra
Source: Royal Society of Chemistry journal article supplement (doi:10.1039/d2dt02316d), 2022-01-01
Supplement: d2dt02316d1.pdf [file d2dt02316d1.pdf]

### Supplementary Information

#### **Pb<sub>2</sub>Cu<sub>10</sub> Observation of a 1/3 magnetization plateau in Pb<sub>2</sub>Cu<sub>10</sub>O<sub>4</sub>(SeO<sub>3</sub>)<sub>4</sub>Cl<sub>7</sub> arising from (Cu<sup>2+</sup>)<sub>7</sub> clusters of corner-sharing (Cu<sup>2+</sup>)<sub>4</sub> tetrahedra**

A.N. Vasiliev,<sup>1,2,3</sup> P.S. Berdonosov,<sup>1,2</sup> E.S. Kozlyakova,<sup>1,2</sup> O.V. Maximova,<sup>1</sup> A.F. Murtazoev,<sup>1</sup> V.A. Dolgikh,<sup>1</sup> K.A. Lyssenko,<sup>1</sup> Z.V. Pchelkina,<sup>3,4</sup> D.I. Gorbunov,<sup>5</sup> **S. H. Chung,**<sup>6</sup> H.-J. Koo,<sup>6</sup> M.-H. Whangbo<sup>6,7</sup>

<sup>1</sup>Lomonosov Moscow State University, Moscow 119991, Russia

<sup>2</sup>National University of Science and Technology "MISiS", Moscow 119049, Russia

<sup>3</sup>Ural Federal University, Ekaterinburg 620002, Russia

<sup>4</sup>Institute of Metal Physics, RAS, Ekaterinburg 620108, Russia

<sup>5</sup>Helmholtz-Zentrum Dresden-Rossendorf, 01328 Dresden, Germany

<sup>6</sup>Kyung Hee University, Seoul 02447, Korea

<sup>7</sup>North Carolina State University, Raleigh, NC 27695, USA

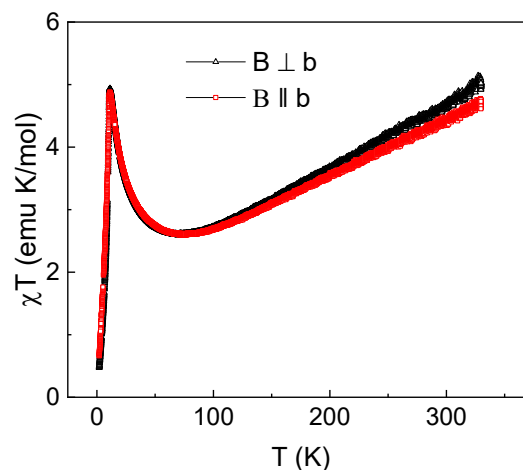

Fig. S1.  $\chi T$  vs.  $T$  plot for Pb<sub>2</sub>Cu<sub>10</sub>O<sub>4</sub>(SeO<sub>3</sub>)<sub>4</sub>Cl<sub>7</sub>.

[1]. Spin exchange paths  $J_1 - J_7$

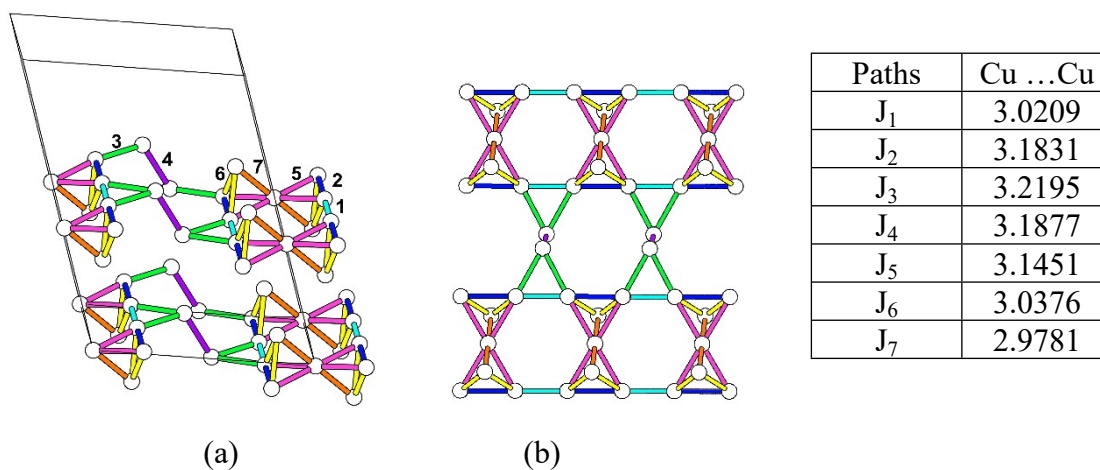

Fig. S2. (a) Seven intralayer spin exchange paths and (b) Projection view along the a-axis of the one-magnetic layer in  $\text{Pb}_2\text{Cu}_{10}\text{O}_4(\text{SeO}_3)_4\text{Cl}_7$ . The cyan, blue, green, purple, pink, yellow and orange cylinders indicate the  $J_1$  to  $J_7$  paths.

Table S1. Geometrical parameters of spin exchange paths,  $J_1$  to  $J_7$

| Paths | Cu ...Cu | $\angle\text{Cu-O-Cu}$ | O...O  | $\angle\text{Cu-O...O, O...O-Cu}$ |
|-------|----------|------------------------|--------|-----------------------------------|
| $J_1$ | 3.0209   | 103.4                  |        |                                   |
| $J_2$ | 3.1831   | 114.5                  |        |                                   |
| $J_3$ | 3.2195   | 114.6                  | 2.5717 | 101.9, 141.8                      |
| $J_4$ | 3.1877   | 106.8,<br>106.8        |        |                                   |
| $J_5$ | 3.1451   | 112.9                  | 2.6287 | 96.9, 98.1                        |
| $J_6$ | 3.0376   | 105.9, 95.9            |        |                                   |
| $J_7$ | 2.9781   | 103.5                  |        |                                   |

[2]  
Orde  
red  
spin  
state

s used to extract the spin exchanges  $J_1 - J_7$

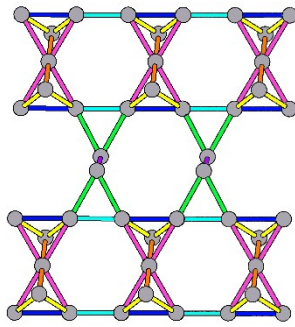

(a) FM

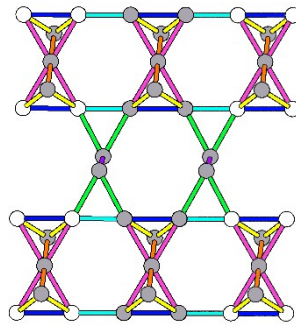

(b) AF1

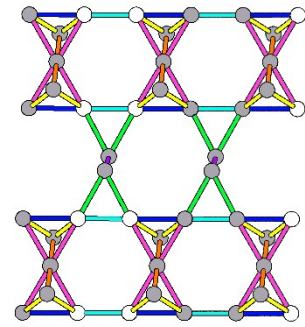

(c) AF2

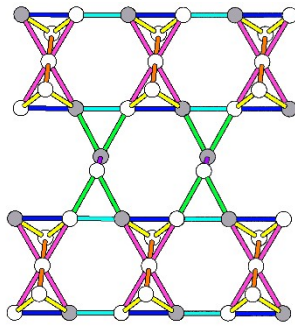

(d) AF3

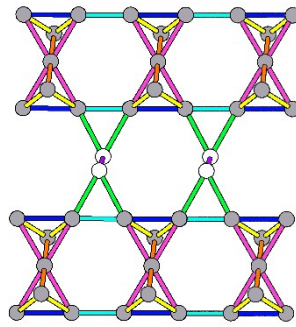

(e) AF4

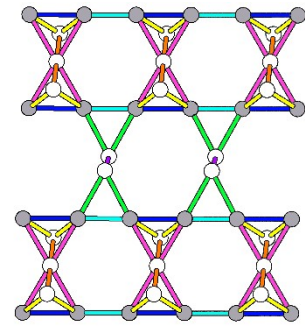

(f) AF5

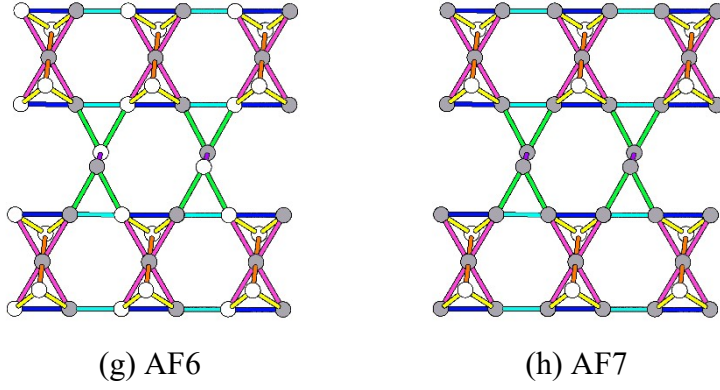

Fig. S3. Ordered spin states, FM and AF( $i$ ) ( $i = 1$  to 7), in  $\text{Pb}_2\text{Cu}_{10}\text{O}_4(\text{SeO}_3)_4\text{Cl}_7$ , where the grey and white circles indicate the up spin and down spin sites of  $\text{Cu}^{2+}$  ions. In these arrangements, we show the one-magnetic layer in  $\text{Pb}_2\text{Cu}_{10}\text{O}_4(\text{SeO}_3)_4\text{Cl}_7$ .

### [3] Energy-mapping analysis

To determine the seven spin exchanges  $J_1$  to  $J_7$  in  $\text{Pb}_2\text{Cu}_{10}\text{O}_4(\text{SeO}_3)_4\text{Cl}_7$ , we considered eight ordered spin states FM, AF( $i$ ) ( $i = 1$  to 7) shown in Figure S2. Then, the total spin exchange energies of these states in (a, 2b, c) supercell can be written as

$$E = \left( \sum_{i=1}^7 n_i J_i S^2 \right)$$

where  $S$  refers to the spin of the  $\text{Cu}^{2+}$  ions (i.e.,  $S = 1/2$ ). The values of  $n_i$  ( $i = 1$  to 7) found for the seven spin states are listed in Table S2. The relative energies (meV/FU) obtained for the FM, AF( $i$ ) ( $i = 1$  to 7) states by DFT+U calculations are listed in Table S3. By mapping the relative energies of the ordered magnetic states determined by DFT+U calculations to those determined by the spin exchange energies, we obtain the values of the spin exchanges,  $J_1$  to  $J_7$  by using the equation S1.

Table S2. Energy expression of the ordered spin arrangements of  $\text{Pb}_2\text{Cu}_{10}\text{O}_4(\text{SeO}_3)_4\text{Cl}_7$

|                  | $J_1$ | $J_2$ | $J_3$ | $J_4$ | $J_5$ | $J_6$ | $J_7$ |
|------------------|-------|-------|-------|-------|-------|-------|-------|
| $E_{\text{FM}}$  | -8    | -8    | -16   | -4    | -16   | -16   | -8    |
| $E_{\text{AF1}}$ | 8     | -8    | 0     | -4    | 0     | 0     | -8    |
| $E_{\text{AF2}}$ | -8    | 8     | 0     | -4    | 0     | 0     | -8    |
| $E_{\text{AF3}}$ | 8     | 8     | 0     | 4     | 0     | 0     | -8    |
| $E_{\text{AF4}}$ | -8    | -8    | 16    | -4    | -16   | -16   | -8    |
| $E_{\text{AF5}}$ | -8    | -8    | 16    | -4    | 16    | 16    | -8    |
| $E_{\text{AF6}}$ | 8     | 8     | 0     | 4     | 0     | 0     | 8     |
| $E_{\text{AF7}}$ | -8    | -8    | -16   | -4    | -16   | 16    | 8     |

Table S3. Relative energies (meV/FU) of  $\text{Pb}_2\text{Cu}_{10}\text{O}_4(\text{SeO}_3)_4\text{Cl}_7$  obtained from DFT+U calculations

|  | $U = 4 \text{ eV}$ | $U = 5 \text{ eV}$ |
|--|--------------------|--------------------|
|  |                    |                    |

|                  |        |        |
|------------------|--------|--------|
| $E_{\text{FM}}$  | 163.73 | 131.02 |
| $E_{\text{AF1}}$ | 133.12 | 108.71 |
| $E_{\text{AF2}}$ | 124.07 | 103.61 |
| $E_{\text{AF3}}$ | 60.14  | 48.77  |
| $E_{\text{AF4}}$ | 163.85 | 131.57 |
| $E_{\text{AF5}}$ | 77.69  | 66.12  |
| $E_{\text{AF6}}$ | 32.47  | 27.02  |
| $E_{\text{AF7}}$ | 0      | 0      |

$$\begin{aligned}
J_3 &= (1/32)(E_{\text{AF4}} - E_{\text{FM}})(4/N^2) \\
J_7 &= (1/16)(4/N^2)(E_{\text{AF6}} - E_{\text{AF3}}) \\
J_6 &= (1/32)\{(E_{\text{AF7}} - E_{\text{FM}})(4/N^2) - 16J_7\} \\
J_5 &= (1/32)\{(E_{\text{AF5}} - E_{\text{AF7}})(4/N^2) - 32J_3 - 16J_7\} \\
J_2 &= (1/16)\{(E_{\text{AF2}} - E_{\text{FM}})(4/N^2) - 16J_3 - 16J_5 - 16J_6\} \\
J_1 &= (1/16)\{(E_{\text{AF1}} - E_{\text{AF2}})(4/N^2) + 16J_2\} \\
J_4 &= (1/8)\{(E_{\text{AF3}} - E_{\text{AF2}})(4/N^2) - 16J_1\}
\end{aligned}$$

#### [4] Computational details

To determine the spin exchanges of  $\text{Pb}_2\text{Cu}_{10}\text{O}_4(\text{SeO}_3)_4\text{Cl}_7$ , we carried out spin polarized DFT+U calculations by using the frozen core projector augmented plane wave (PAW)<sup>1,2</sup> encoded in the Vienna ab Initio Simulation Packages (VASP)<sup>3</sup> and the PBE<sup>4</sup> exchange correlation functional. The electron correlation associated with the 3d states of Cu was taken into consideration by DFT+U calculations<sup>5</sup> with an effective on-site repulsion  $U_{\text{eff}} = U - J = 4$  and 5 eV. All our DFT calculations used the plane wave cutoff energy of 450 eV, a set of  $(2 \times 4 \times 4)$  k-points and the threshold of  $10^{-6}$  eV for self-consistent-field energy convergence.

#### References

1. P. E. Blöchl, *Phys. Rev. B* 1994, **50**, 17953.
2. G. Kresse and D. Joubert, *Phys. Rev. B* 1999, **59**, 1758.
3. G. Kresse and J. Furthmüller, *Phys. Rev. B* 1996, **54**, 11169).
4. J. P. Perdew, K. Burke and M. Ernzerhof, *Phys. Rev. Lett.* 1996, **77**, 3865.
5. S. L. Dudarev, G. A. Botton, S. Y. Savrasov, C. J. Humphreys and A. P. Sutton, *Phys. Rev. B* 1998, **57**, 1505.
